# Supplementary material for: Profound inhibition of CD73-dependent formation of anti-inflammatory adenosine in B cells of SLE patients
Source: PubMed Central journal article supplement — eBioMedicine. 2021 Oct 16;73:103616. doi: 10.1016/j.ebiom.2021.103616 (PMC8524755; doi:10.1016/j.ebiom.2021.103616), 2021-10-16
Supplement: mmc1.pdf [file mmc1.pdf]

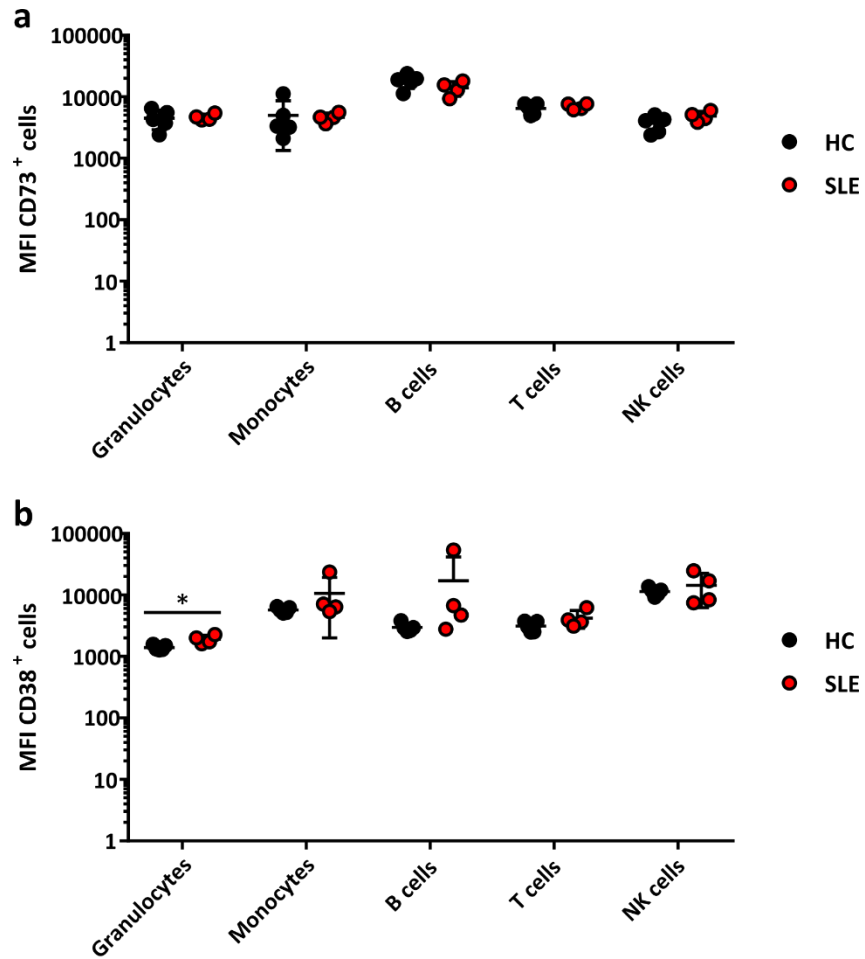

**Supplementary Figure 1 Mean fluorescence intensities of CD73 and CD38 on peripheral blood leukocytes.**

**a** Mean fluorescence intensity (MFI) of CD73 on CD73<sup>+</sup> cells among peripheral blood leukocyte populations from healthy controls (HC) and SLE patients (SLE) analysed by flow cytometry. **b** MFI of CD38 on CD38<sup>+</sup> cells among peripheral blood leukocyte populations. (HC  $n=5$ , SLE  $n=4$  donors). \* $P<0.05$  [Multiple  $t$  tests].

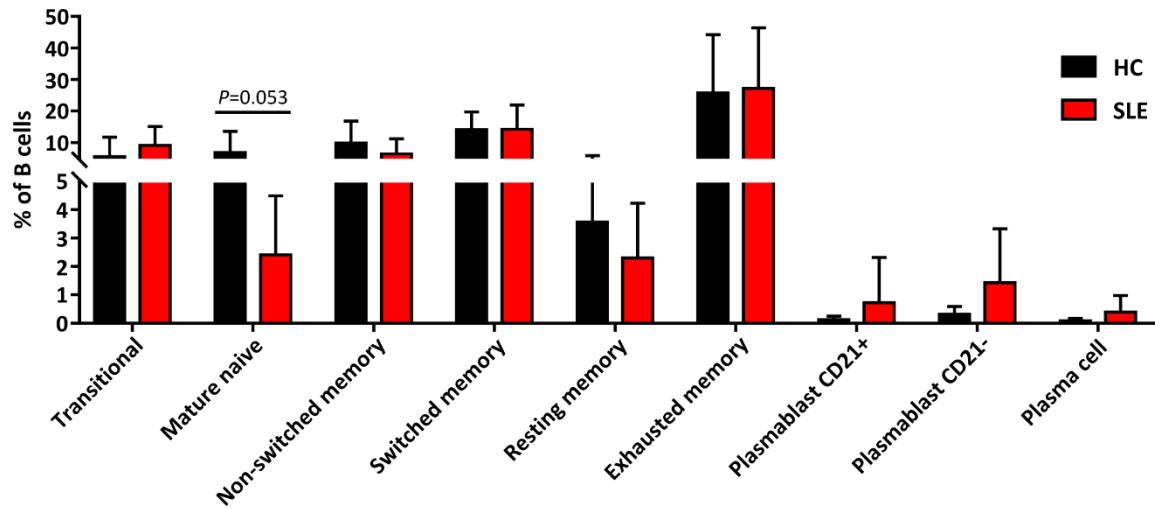

**Supplementary Figure 2 Distribution of B cell subsets.**

Relative distribution of B cell subsets in HC and SLE peripheral blood analysed by flow cytometry (HC  $n=15$ , SLE  $n=23$  donors). Means  $\pm$  SD.  $P>0.05$  [Multiple  $t$  tests].

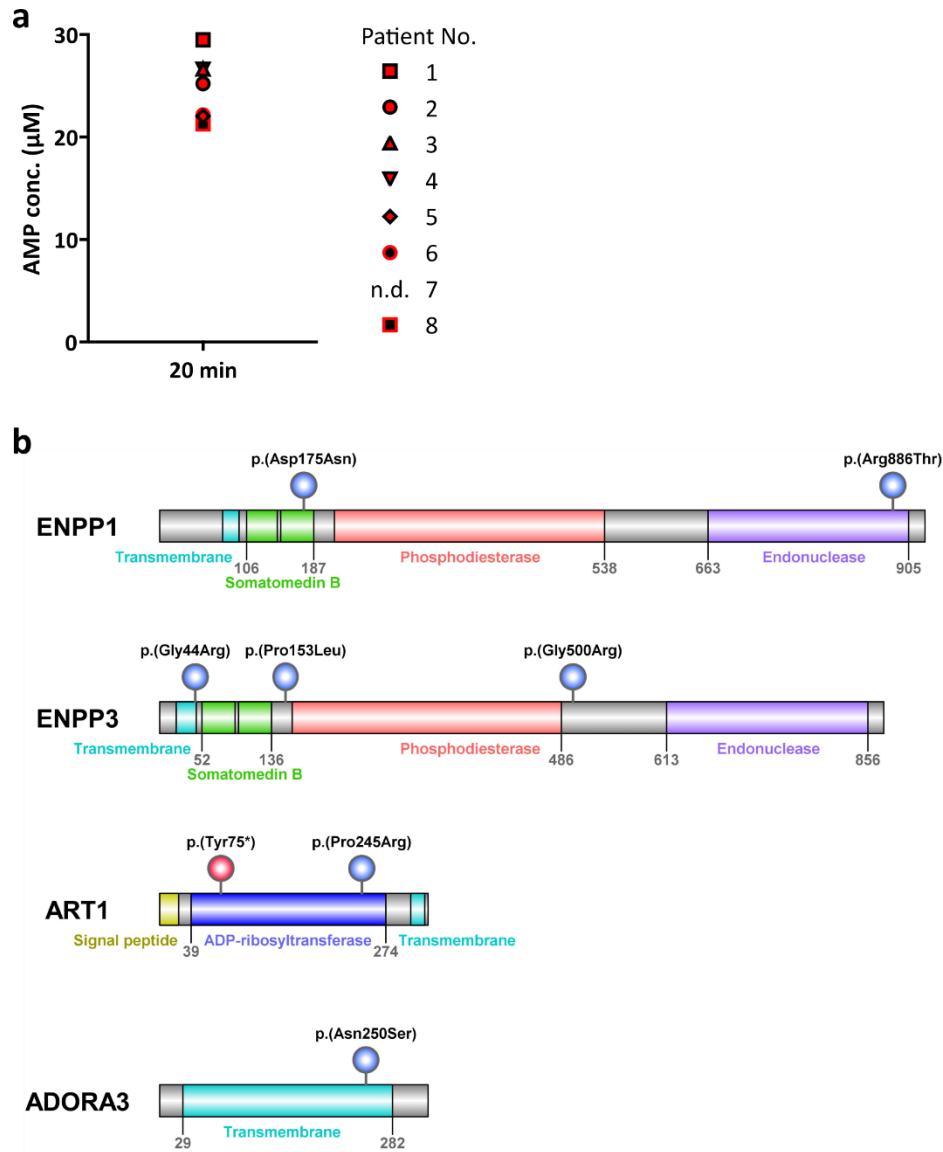

**Supplementary Figure 3 AMP metabolism of SLE B cells applied to DNA sequencing and location of identified sequence variants in affected proteins.**

**a** AMP concentrations in the supernatant of SLE B cells, which were applied to DNA sequencing, after 20 min incubation with 20  $\mu\text{M}$  AMP as measured by HPLC. n.d. not determined. **b** Location of the via DNA sequencing of SLE B cells identified amino acid shifts in the affected proteins. Protein domain locations were taken from Pfam (<http://pfam.xfam.org/>). Red: protein truncating variant; blue: missense variant.

**Supplementary Table 1 Characteristics of the SLE patient pool used in this study.**

| <b>Patient characteristics [units, normal range]</b> | <b>mean</b> | <b>(SD)</b> |
|------------------------------------------------------|-------------|-------------|
| number of patients [n]                               | 68          |             |
| age [yrs]                                            | 45.8        | (13.7)      |
| sex (n)                                              | female      | 59          |
|                                                      | male        | 9           |
| disease duration [yrs]                               | 17.1        | (10.1)      |
| SLE Disease Activity Index 2000 (SLEDAI-2K)          | 3.0         | (3.0)       |
| SLE Questionnaire for Population Studies (SLAQ)      | 6.0         | (5.5)       |
| BMI [kg/m <sup>2</sup> ]                             | 24.6        | (4.0)       |
| CRP [mg/dl, < 0.5]                                   | 0.3         | (0.3)       |
| LDH [U/l, < 247]                                     | 217.5       | (58.5)      |
| AST [U/l, < 31]                                      | 26.6        | (9.1)       |
| ALT [U/l, < 35]                                      | 22.6        | (10.4)      |
| hemoglobin [mg/dl, 11.9 – 14.6]                      | 13.2        | (1.6)       |
| leukocytes [x1000/ $\mu$ l, 4.5 – 12.7]              | 6.4         | (2.3)       |
| C3 [mg/dl, 90 - 180]                                 | 100.1       | (26.2)      |
| C4 [mg/dl, 10 - 40]                                  | 16.9        | (8.7)       |
| IgG [mg/dl, 700 - 1600]                              | 1232.0      | (314.7)     |
| IgA [mg/dl, 70 - 500]                                | 234.6       | (100.9)     |
| IgM [mg/dl, 40 - 280]                                | 123.9       | (131.5)     |
| anti-dsDNA antibodies [IU/ml, < 80]                  | 230.4       | (219.0)     |
| creatinin [mg/dl, < 0.9]                             | 0.8         | (0.2)       |
| GFR [ml/min, 90 - 140]                               | 91.3        | (20.1)      |
| <u>Urin analysis:</u>                                |             |             |
| -erythrocytes [ / $\mu$ l, < 23]                     | 17.0        | (11.2)      |
| -leukocytes [ / $\mu$ l, < 20]                       | 33.0        | (48.8)      |
| -protein [mg/gCreatinin, < 150]                      | 146.4       | (194.6)     |
